# Supplementary material
Source: PubMed Central journal article supplement (PMC2577219)

A

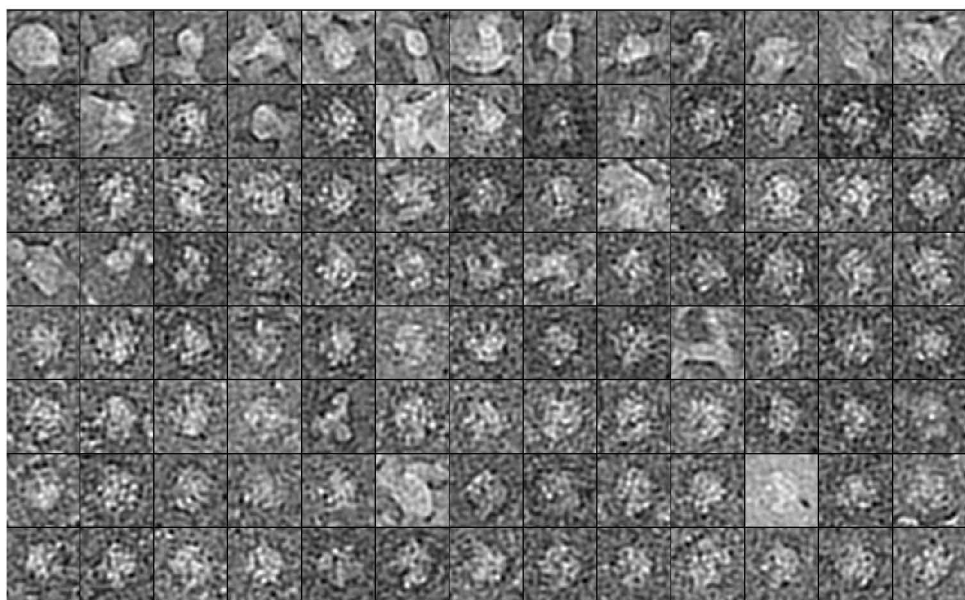

B

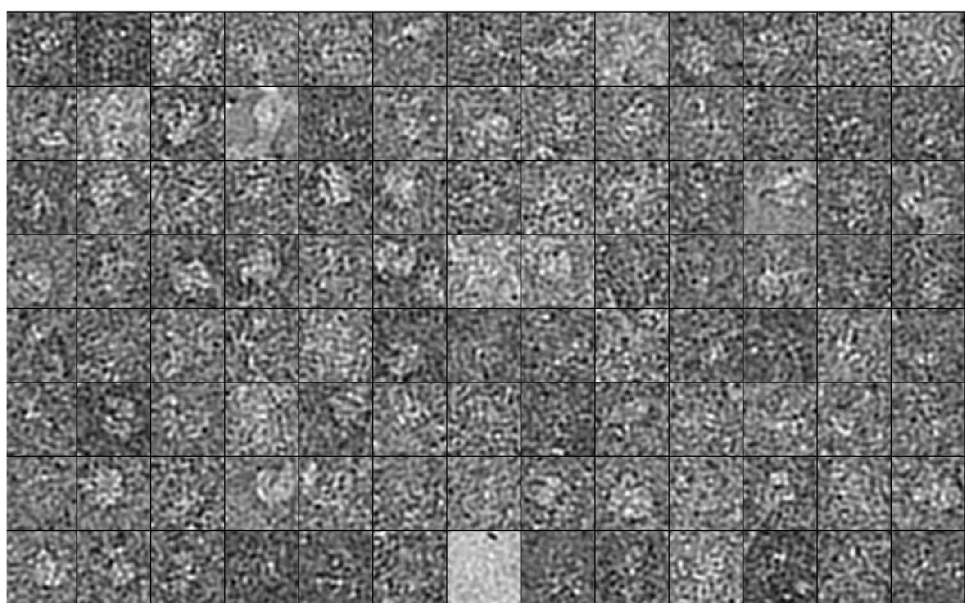

C

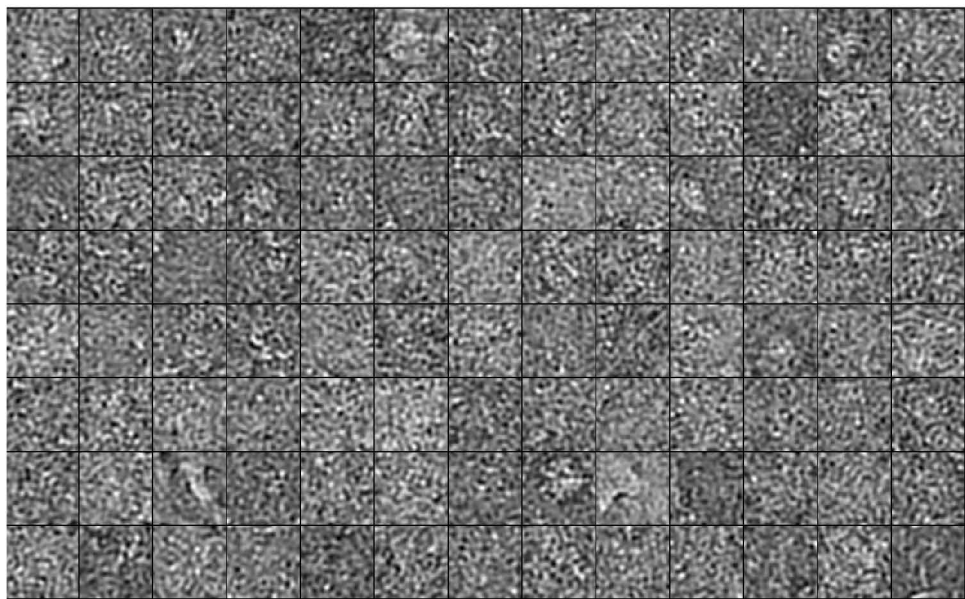

Supplement: NIHMS72620-supplement-01.pdf [file NIHMS72620-supplement-01.pdf]

A

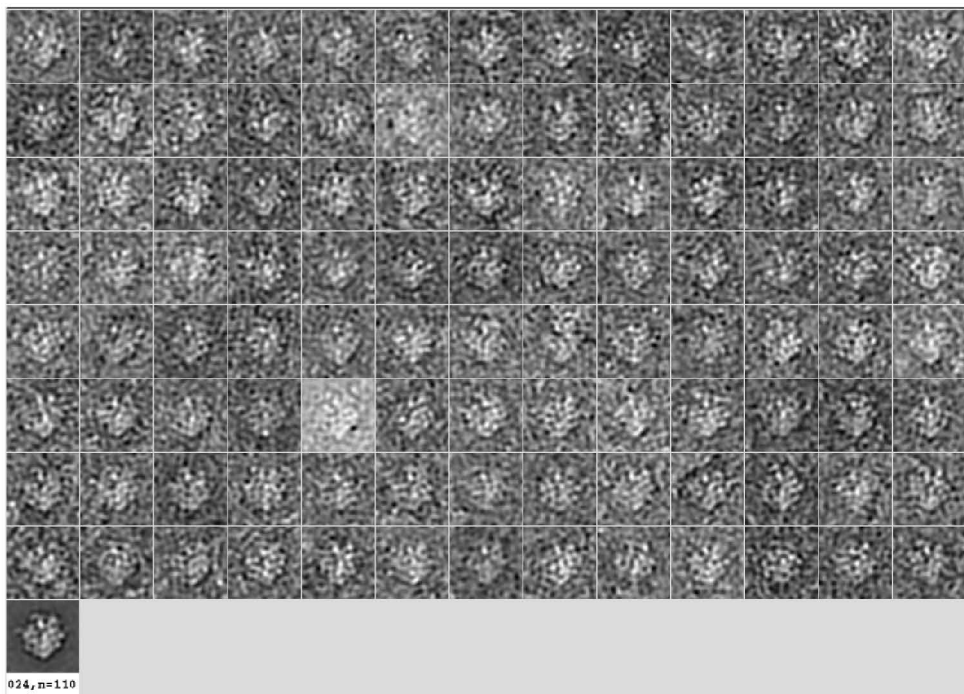

B

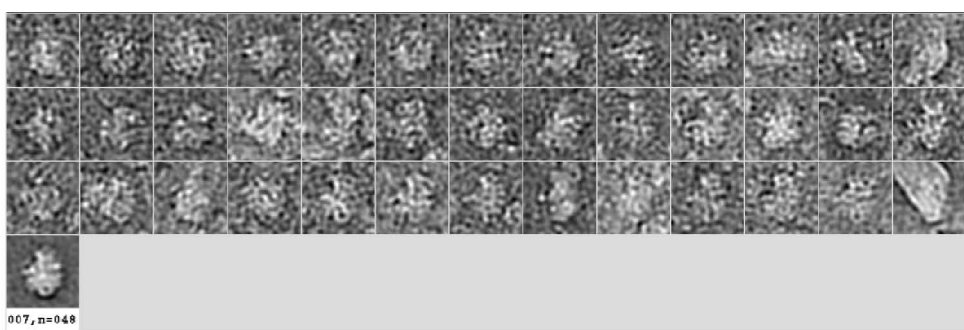

C

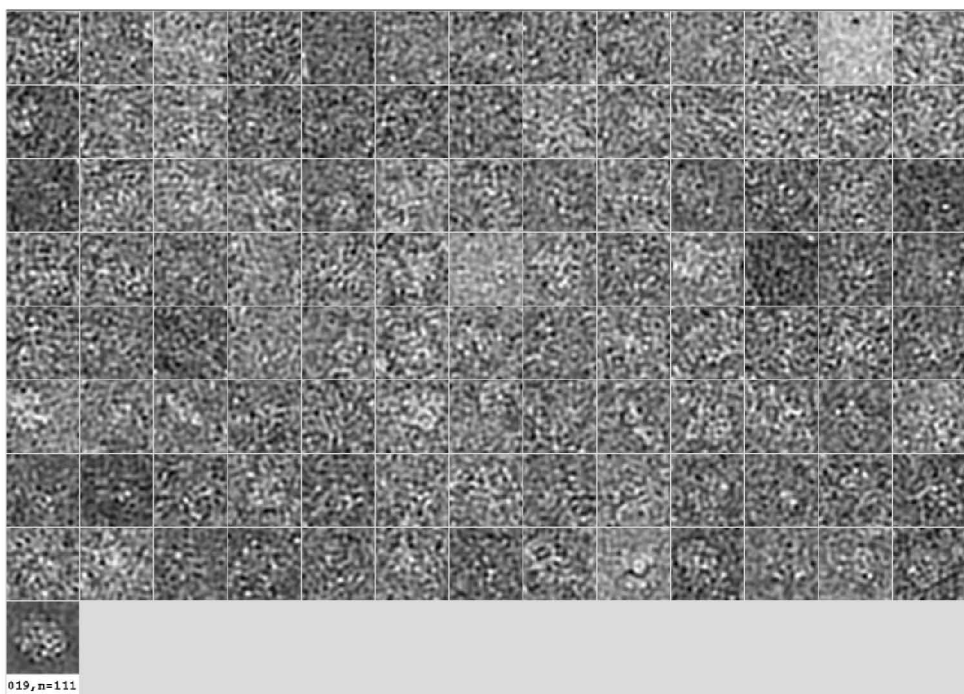

D

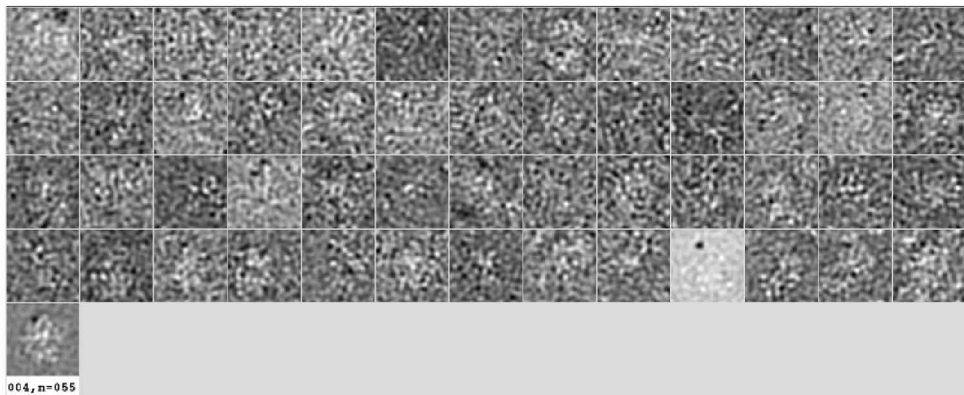

Supplement: NIHMS72620-supplement-02.pdf [file NIHMS72620-supplement-02.pdf]

A

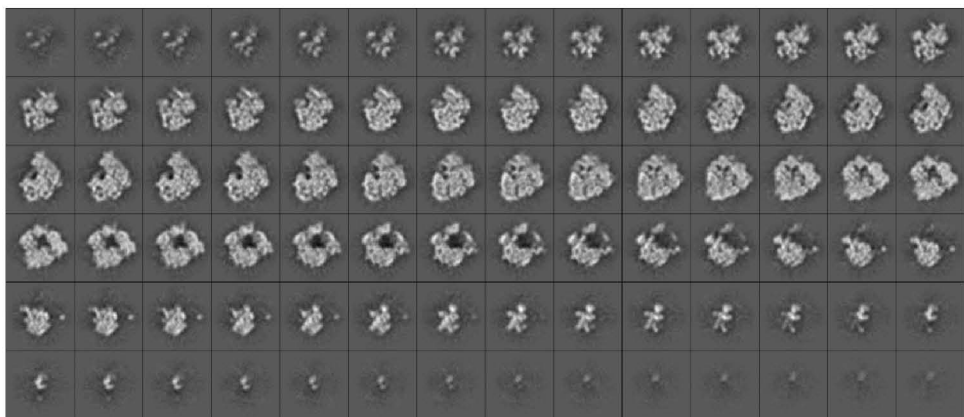

B

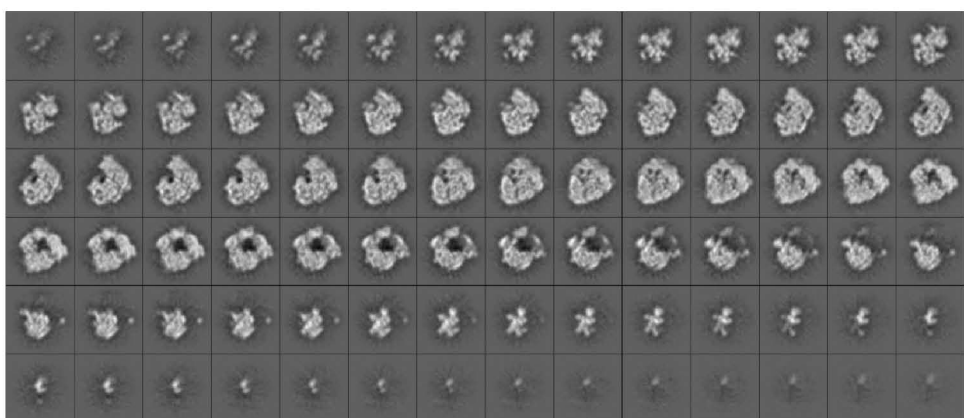

C

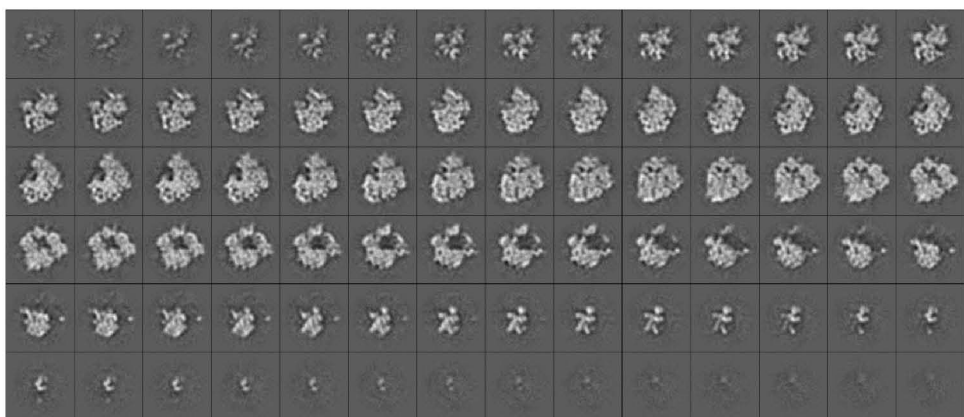

Supplement: NIHMS72620-supplement-03.pdf [file NIHMS72620-supplement-03.pdf]
